# Supplementary material for: Fluorescence-Based Monitoring of In Vivo Neural Activity Using a Circuit-Tracing Pseudorabies Virus
Source: PubMed Central journal article supplement (PMC2735035; doi:10.1371/journal.pone.0006923), 2009-09-09

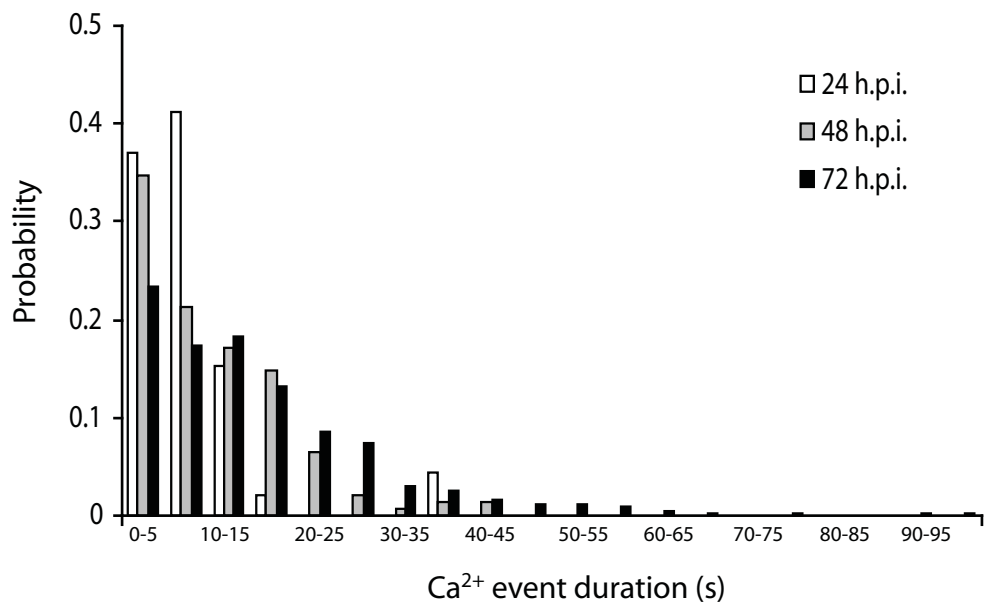

Supplement: pone.0006923.s001.pdf [file pone.0006923.s001.pdf]
